# Supplementary material for: Non-targeted LC-MS metabolomics reveals serum metabolites for high-altitude adaptation in Tibetan donkeys
Source: PubMed Central journal article supplement — Sci Rep. 2025 Jan 2;15:46. doi: 10.1038/s41598-024-83544-8 (PMC11696620; doi:10.1038/s41598-024-83544-8), 2025-01-02
Supplement: 41598_2024_83544_MOESM1_ESM.pdf [file 41598_2024_83544_MOESM1_ESM.pdf]

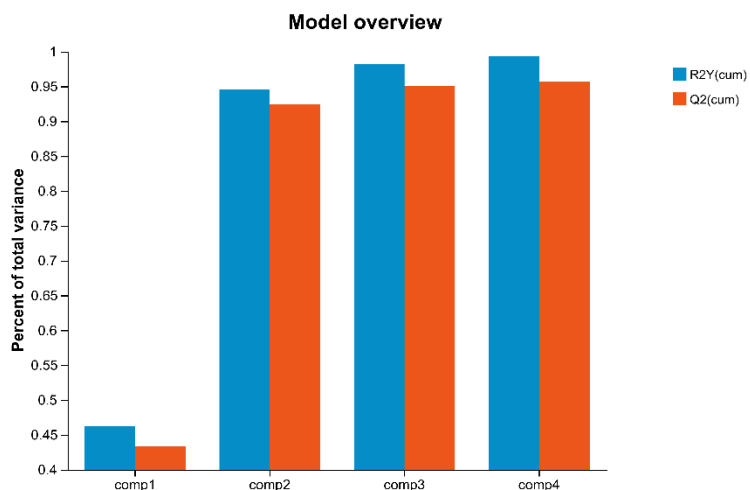

**Figure S1. Model Overview**

R2Y and Q2 are used to evaluate the interpretation and prediction ability of the PLS-DA model, respectively. The larger the cumulative value of R2Y and Q2, the more stable and reliable the model.

**Table S2. Model parameter table**

|    | R2X(cum) | R2Y(cum) | Q2(cum) |
|----|----------|----------|---------|
| p1 | 0.316    | 0.462    | 0.433   |
| p2 | 0.468    | 0.946    | 0.924   |
| p3 | 0.511    | 0.982    | 0.95    |
| p4 | 0.555    | 0.993    | 0.957   |

R2X (cum) and R2Y (cum) represent the cumulative interpretation rate; Q2 represents the prediction ability of the model. p1 and p2 represent the first and second principal components respectively.
